# Supplementary material for: Molecular and Morphological Study of Leaping Frogs (Anura, Ranixalidae) with Description of Two New Species
Source: PubMed Central journal article supplement (PMC5112961; doi:10.1371/journal.pone.0166326), 2016-11-16
Supplement: pone.0166326.s001.pdf [file pone.0166326.s001.pdf]

**Molecular and morphological study of Leaping frogs (Anura, Ranixalidae) with description of two new species**

Sonali Garg and SD Biju | PLoS One 2016

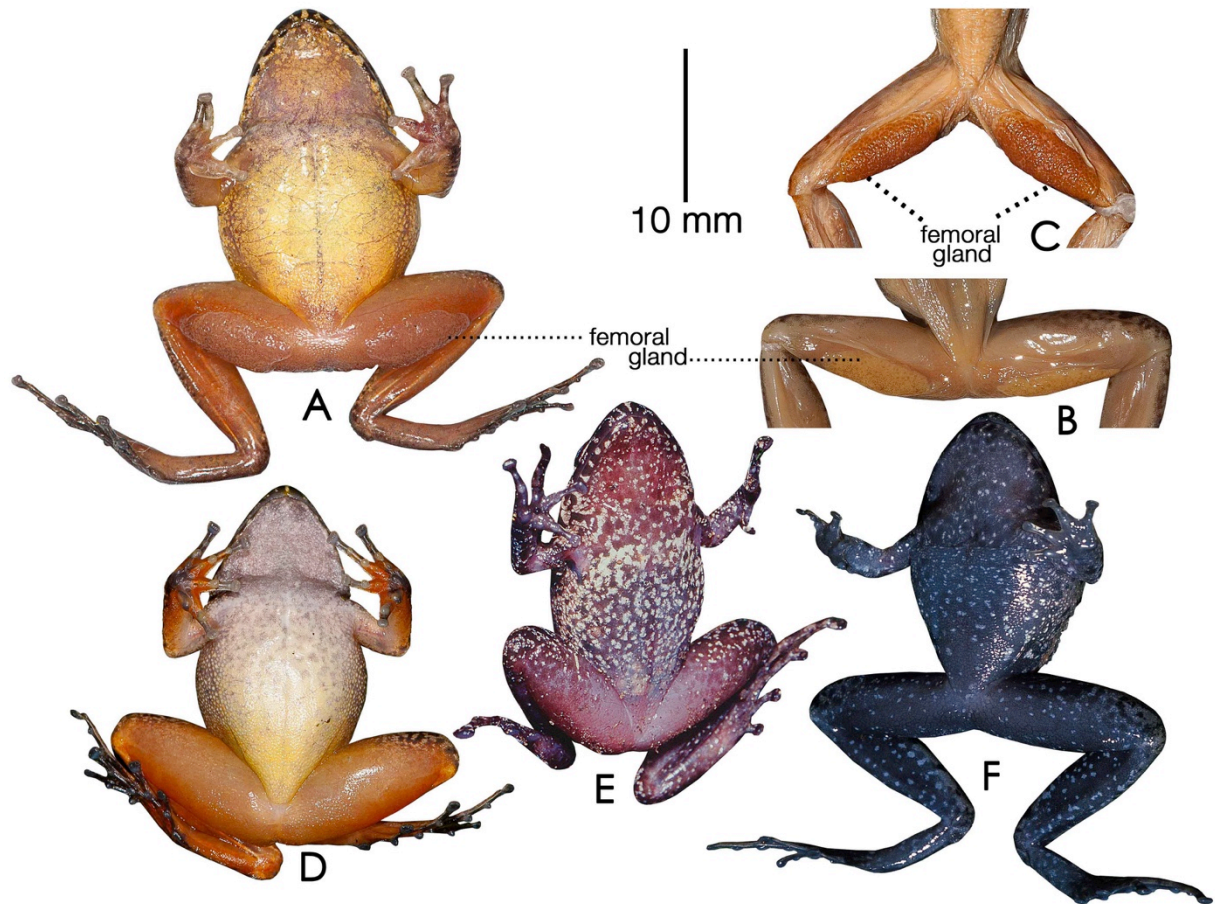

**S1 Fig. Ventral coloration and femoral glands in ranixalid species.** (A, B) *Indirana semipalmata*, male (SDBDU 2015.3034) with femoral glands. (A) In life. (B) In preservation. (C) *I. gundia*, male (MNHN 1985.0633) with femoral glands (in preservation). (D) *I. brachytarsus*, male (SDBDU 2015.2931), without femoral glands (in life). (E) *Sallywalkerana leptodactyla*, male (SDBDU 2003.40336), without femoral glands (in life). (F) *S. phrynoderma*, female (SDBDU 2002.1 181), having a distinct bluish-black ventral surface with scattered grey color speckles (in life).
