# Supplementary material for: Molecular and Morphological Study of Leaping Frogs (Anura, Ranixalidae) with Description of Two New Species
Source: PubMed Central journal article supplement (PMC5112961; doi:10.1371/journal.pone.0166326), 2016-11-16
Supplement: pone.0166326.s002.pdf [file pone.0166326.s002.pdf]

**Molecular and morphological study of Leaping frogs (Anura, Ranixalidae) with description of two new species**

Sonali Garg and SD Biju | PLoS One 2016

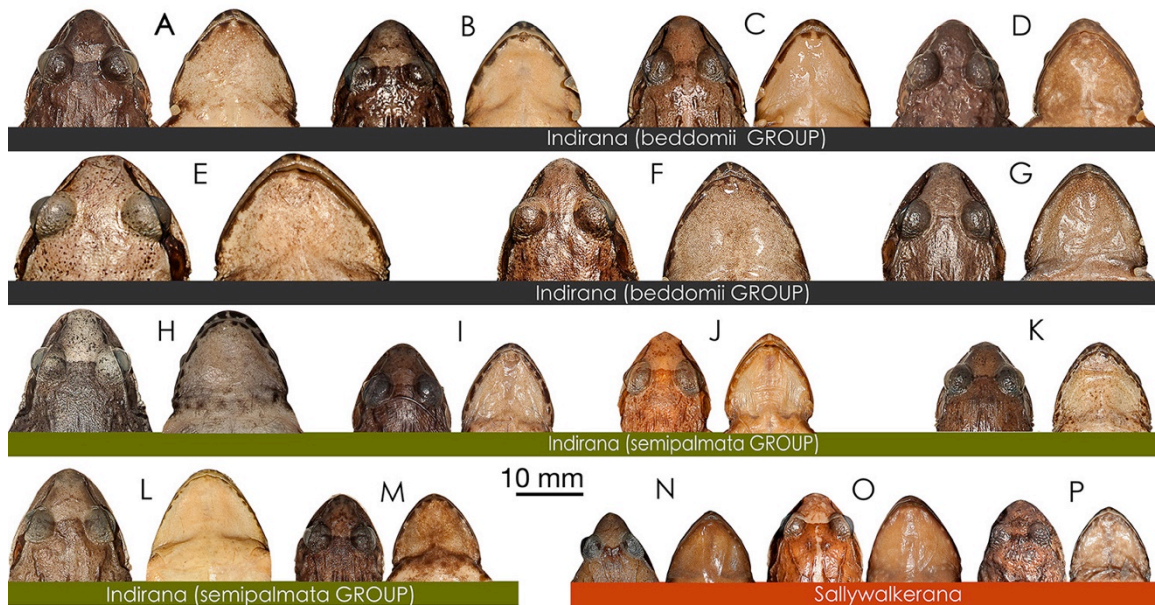

**S2 Fig. Lateral view of head in ranixalid species.** (A–G) *Indirana beddomii* group. (A) *I. beddomii*, male (SDBDU 2010.225) and female (SDBDU 2011.961). (B) *I. bhadrai*, female (ZSI/WGRC/V/A887). (C) *I. brachytarsus*, male (SDBDU 2015.2931) and female (SDBDU 2012.814). (D) *I. leithii*, male (SDBDU 2014. 2515) and female (SDBDU 2014.2514). (E) *I. sarojamma*, male (SDBDU 2002.334) and female (SDBDU 2002.516). (F) *I. tysoni*, male (SDBDU 2012.74) and female (SDBDU 2012.73). (G) *I. yadera*, male (SDBDU 2012.2744) and female (SDBDU 2015.3155). (H–M) *Indirana semipalmata* group. (H) *I. chiravasi*, male (SDBDU 2012.2125) and female (SDBDU 2015.3087). (I) *I. duboisi*, male (SDBDU 2003.1086) and female (SDBDU 2011.1399). (J) *I. gundia*, male (MNHN 1985.0633) and female (MNHN 1985.0621). (K) *I. paramakri*, male (SDBDU 2005.3741) and female (ZSI/WGRC/V/A888). (L) *I. salelkari*, female (SDBDU 2011.1330). (M) *I. semipalmata*, male (SDBDU 2015.3035) and female (SDBDU 2006.4773A). (N–P) Genus *Sallywalkerana*. (N) *S. diplosticta*, male (SDBDU 2003.40103) and female (SDBDU 2002.513). (O) *S. leptodactyla*, male (SDBDU 2004.40336) and female (SDBDU 2013.911). (P) *S. phrynoderma*, male (SDBDU 2002.1181).
