# Supplementary material for: Molecular and Morphological Study of Leaping Frogs (Anura, Ranixalidae) with Description of Two New Species
Source: PubMed Central journal article supplement (PMC5112961; doi:10.1371/journal.pone.0166326), 2016-11-16
Supplement: pone.0166326.s003.pdf [file pone.0166326.s003.pdf]

**Molecular and morphological study of Leaping frogs (Anura, Ranixalidae) with description of two new species**

Sonali Garg and SD Biju | PLoS One 2016

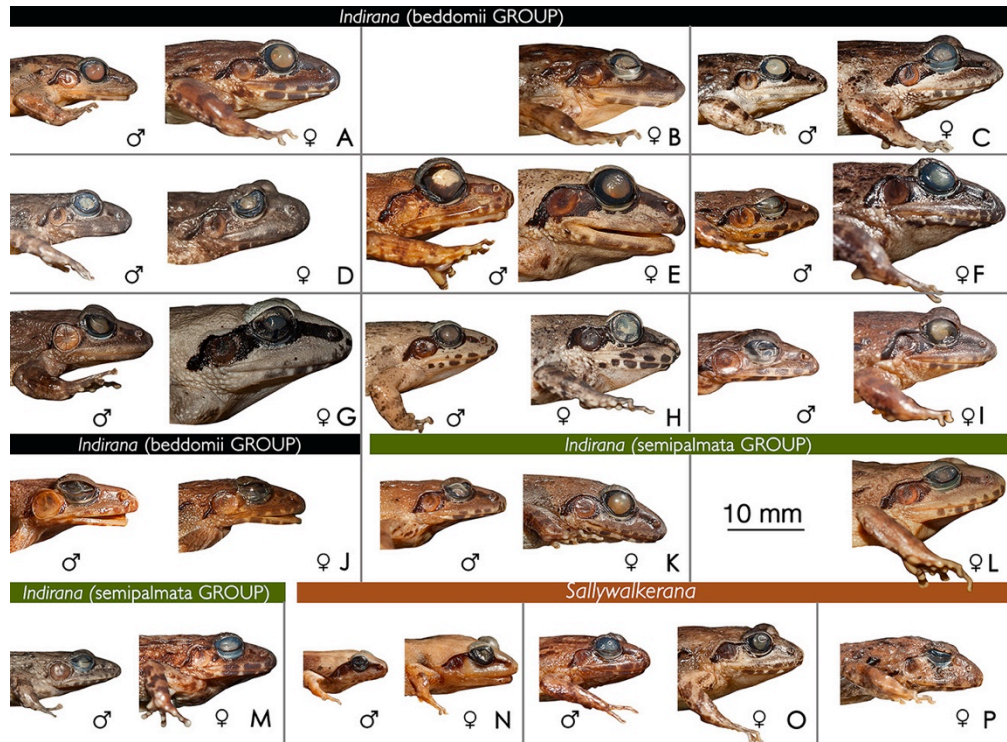

**S3 Fig.** Dorsal (left) and ventral (right) views of head in ranixalid species. (A–G) *Indirana beddomii* group. (A) *I. beddomii*, female (SDBDU 2011.961). (B) *I. bhadrai*, female (ZSI/WGRC/V/A887). (C) *I. brachytarsus*, female (SDBDU 2002.4091). (D) *I. leithii*, female (SDBDU 2002.2010). (E) *I. sarojamma*, female (SDBDU 2002.516). (F) *I. tysoni*, female (SDBDU 2012.73). (G) *I. yadera*, male (SDBDU 2012.2744). (H–M) *Indirana semipalmata* group. (H) *I. chiravasi*, female (SDBDU 2015.3087). (I) *I. duboisi*, male (SDBDU 2003.1086). (J) *I. gundia*, male (MNHN 1985.0633). (K) *I. paramakri*, female (ZSI/WGRC/V/A888). (L) *I. salelkari*, female (SDBDU 2011.1330). (M) *I. semipalmata*, female (SDBDU 2006.4773). (N–P) Genus *Sallywalkerana*. (N) *S. diplosticta*, female (SDBDU 2002.1249). (O) *S. leptodactyla*, female (SDBDU 2002.917). (P) *S. phrynoderma*, male (SDBDU 2002.1181).
