# Supplementary material for: Molecular and Morphological Study of Leaping Frogs (Anura, Ranixalidae) with Description of Two New Species
Source: PubMed Central journal article supplement (PMC5112961; doi:10.1371/journal.pone.0166326), 2016-11-16
Supplement: pone.0166326.s004.pdf [file pone.0166326.s004.pdf]

**Molecular and morphological study of Leaping frogs (Anura, Ranixalidae) with description of two new species**

Sonali Garg and SD Biju | PLoS One 2016

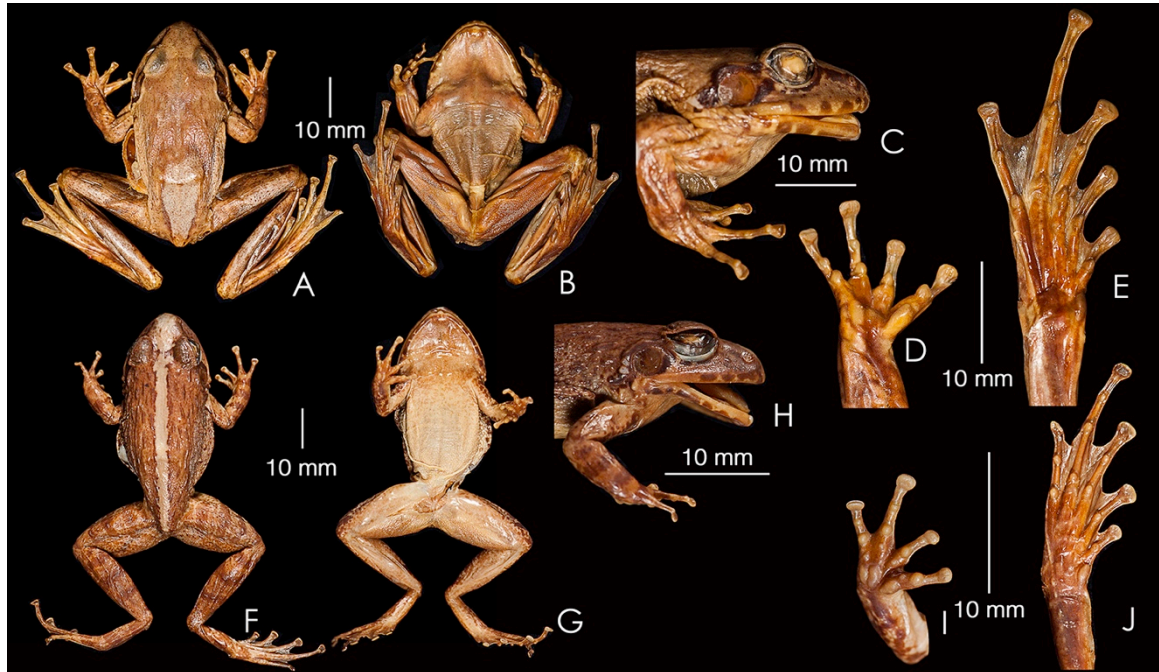

**S4 Fig.** *Indirana beddomii* group in preservation. From left to right: Dorsal view, ventral view, lateral view of head, ventral view of hand, ventral view of foot. (A–E) Lectotype of *Polypedates beddomii* (= *Indirana beddomii*), NHM 74.4.29.208 (ex BMNH 1947.2.27.72), female. (F–J) Lectotype of *Polypedates brachytarsus* (= *Indirana brachytarsus*), NHM 74.4.29.1307 (ex BMNH 1947.2.27.92), female.
