# Supplementary material for: Molecular and Morphological Study of Leaping Frogs (Anura, Ranixalidae) with Description of Two New Species
Source: PubMed Central journal article supplement (PMC5112961; doi:10.1371/journal.pone.0166326), 2016-11-16
Supplement: pone.0166326.s005.pdf [file pone.0166326.s005.pdf]

Supporting information Figure 5

**Molecular and morphological study of Leaping frogs (Anura, Ranixalidae) with description of two new species**

Sonali Garg and SD Biju | PLoS One 2016

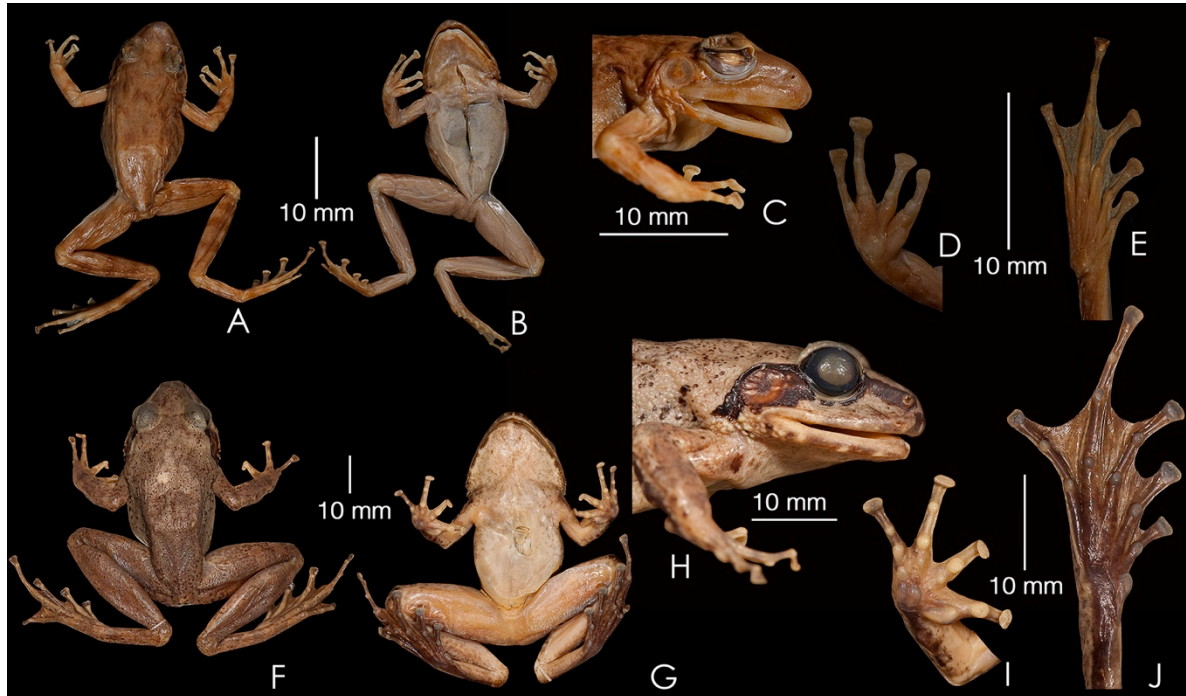

**S5 Fig.** *Indirana beddomii* group in preservation. From left to right: Dorsal view, ventral view, lateral view of head, ventral view of hand, ventral view of foot. (A–E) Holotype of *Rana leithii* (= *Indirana leithii*), NHM 69.8.28.50 (ex BMNH 1947.2.28.17), female. (F–J) *Indirana sarojamma*, SDBDU 2002.516, female.
