# Supplementary material for: Molecular and Morphological Study of Leaping Frogs (Anura, Ranixalidae) with Description of Two New Species
Source: PubMed Central journal article supplement (PMC5112961; doi:10.1371/journal.pone.0166326), 2016-11-16
Supplement: pone.0166326.s006.pdf [file pone.0166326.s006.pdf]

**Molecular and morphological study of Leaping frogs (Anura, Ranixalidae) with description of two new species**

Sonali Garg and SD Biju | PLoS One 2016

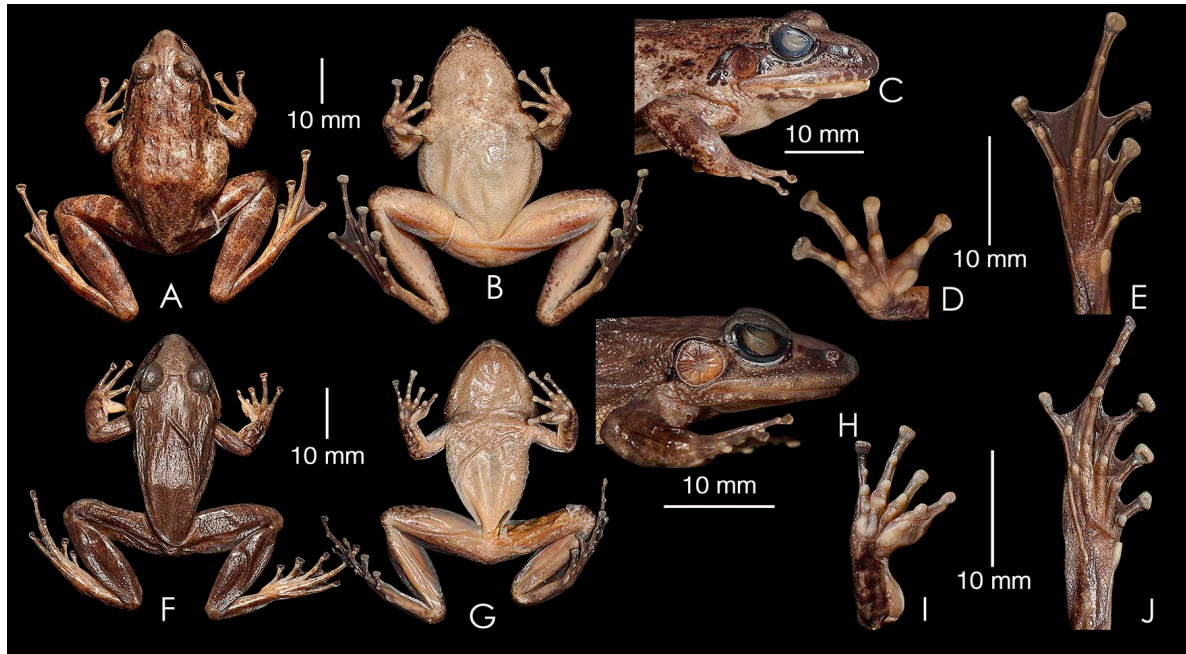

**S6 Fig.** *Indirana beddomii* group in preservation. From left to right: Dorsal view, ventral view, lateral view of head, ventral view of hand, ventral view of foot. (A–E) *Indirana tysoni*, SDBDU 2012.73, female. (F–J) *Indirana yadera*, SDBDU 2012.2744, male.
