# Supplementary material for: Molecular and Morphological Study of Leaping Frogs (Anura, Ranixalidae) with Description of Two New Species
Source: PubMed Central journal article supplement (PMC5112961; doi:10.1371/journal.pone.0166326), 2016-11-16
Supplement: pone.0166326.s008.pdf [file pone.0166326.s008.pdf]

**Molecular and morphological study of Leaping frogs (Anura, Ranixalidae) with description of two new species**

Sonali Garg and SD Biju | PLoS One 2016

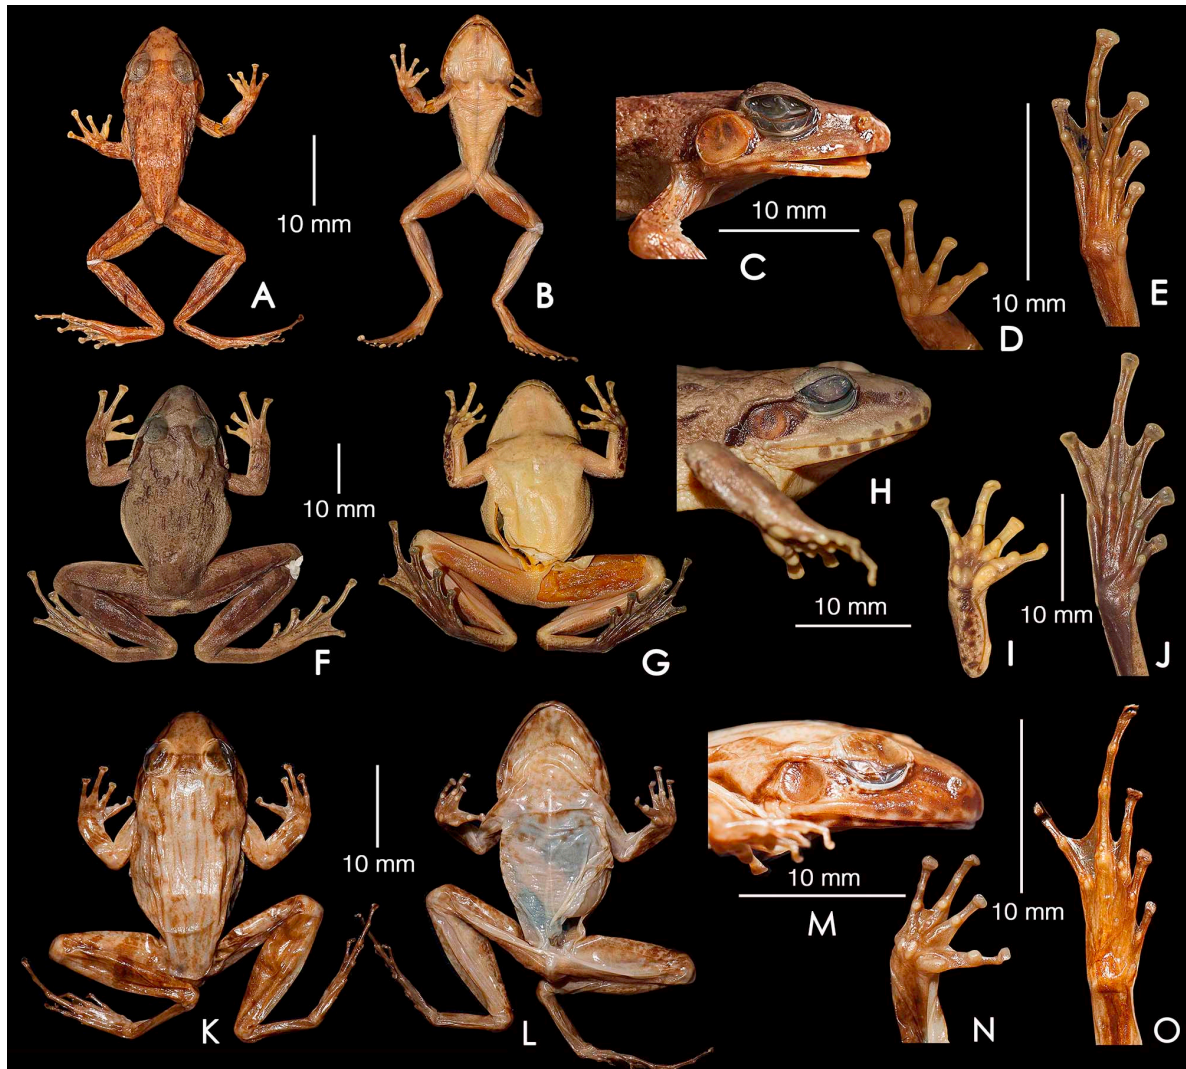

**S8 Fig.** *Indirana semipalmata* group in preservation. From left to right: Dorsal view, ventral view, lateral view of head, ventral view of hand, ventral view of foot. (A–E) Holotype of *Ranixalus gundia* (= *Indirana gundia*), MNHN 1985.0633, male. (F–J) *Indirana salelkari*, SDBDU 2011.1330, female. (K–O) Lectotype of *Rana semipalmata* (= *Indirana semipalmata*), NHM 74.4.29.605 (ex BMNH 1947.2.29.50), female.
