# Supplementary material for: Molecular and Morphological Study of Leaping Frogs (Anura, Ranixalidae) with Description of Two New Species
Source: PubMed Central journal article supplement (PMC5112961; doi:10.1371/journal.pone.0166326), 2016-11-16
Supplement: pone.0166326.s009.pdf [file pone.0166326.s009.pdf]

**Molecular and morphological study of Leaping frogs (Anura, Ranixalidae) with description of two new species**

Sonali Garg and SD Biju | PLoS One 2016

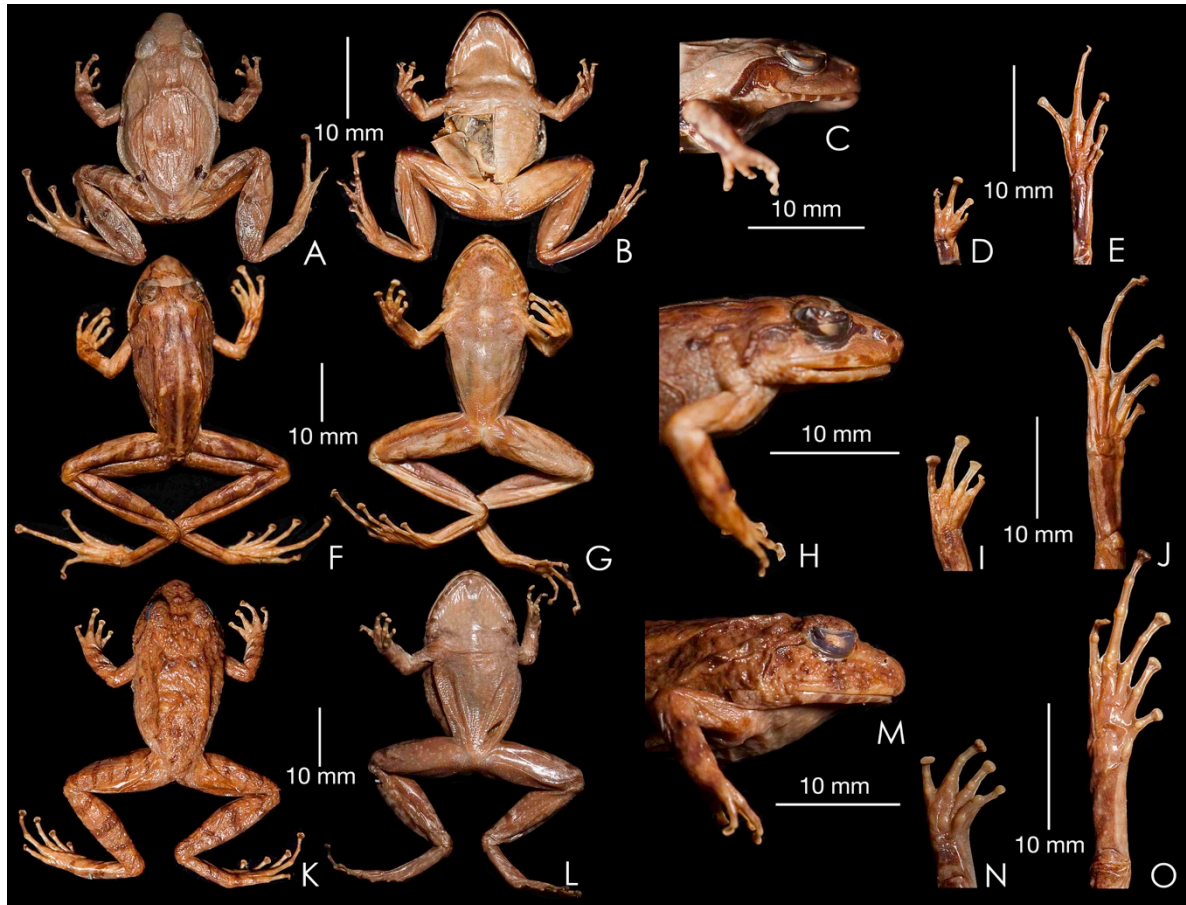

**S9 Fig. Genus *Sallywalkerana* in preservation. From left to right: Dorsal view, ventral view, lateral view of head, ventral view of hand, ventral view of foot. (A–E) Lectotype of *Ixalus diplostictus* (= *Sallywalkerana diplosticta*), NHM 74.4.29.1412 (ex BMNH 1947.2.2.21), female. (F–J) Lectotype of *Rana leptodactyla* (= *Sallywalkerana leptodactyla*), NHM 74.4.29.593 (ex BMNH 1947.2.29.39), female. (K–O) Lectotype of *Rana phrynoderma* (= *Sallywalkerana phrynoderma*), NHM 82.2.10.21 (ex BMNH 1947.2.3.8), female.**
