# Supplementary material for: Molecular and Morphological Study of Leaping Frogs (Anura, Ranixalidae) with Description of Two New Species
Source: PubMed Central journal article supplement (PMC5112961; doi:10.1371/journal.pone.0166326), 2016-11-16
Supplement: pone.0166326.s011.pdf [file pone.0166326.s011.pdf]

**Molecular and morphological study of Leaping frogs (Anura, Ranixalidae) with description of two new species**

Sonali Garg, SD Biju

**S1 Table. Collection localities of ranixalid species reported in this study.** Localities are arranged by State.

| Locality                           | Altitude<br>(meters) | Coordinates   |                | Species recorded                        |
|------------------------------------|----------------------|---------------|----------------|-----------------------------------------|
|                                    |                      | Latitude (°N) | Longitude (°E) |                                         |
| <b>INDIA</b>                       |                      |               |                |                                         |
| <b>Tamil Nadu</b>                  |                      |               |                |                                         |
| <b><i>Coimbatore district</i></b>  |                      |               |                |                                         |
| Grass Hills                        | 1800                 | 10.3167       | 77.0667        | <i>S. leptodactyla</i>                  |
| Grass Hills, Akkamalai shola       | 1750                 | 10.3415       | 77.0212        | <i>S. phrynoderma</i>                   |
| Valparai                           | 1480                 | 10.3887       | 76.9964        | <i>S. leptodactyla</i>                  |
| Valparai, Andiparai shola          | 1228                 | 10.3678       | 76.9672        | <i>I. brachytarsus, S. leptodactyla</i> |
| Top Slip, Karian Shola             | 775                  | 10.4667       | 76.9167        | <i>I. semipalmata</i>                   |
| <b><i>Dindigul district</i></b>    |                      |               |                |                                         |
| Kodaikanal                         | 1780                 | 10.2333       | 77.4833        | <i>S. leptodactyla</i>                  |
| <b><i>Kanyakumari district</i></b> |                      |               |                |                                         |
| Glenback Estate, Kiriparai         | 450                  | 08.4188       | 77.4182        | <i>I. brachytarsus</i>                  |
| <b><i>Tirunelveli district</i></b> |                      |               |                |                                         |
| Kakkachi                           | 1266                 | 08.5488       | 77.3904        | <i>I. brachytarsus</i>                  |
| Kakkachi                           | 1200                 | 08.6667       | 77.6333        | <i>I. brachytarsus</i>                  |
| <b>Kerala</b>                      |                      |               |                |                                         |
| <b><i>Ernakulam district</i></b>   |                      |               |                |                                         |
| Neriamangalam                      | 205                  | 10.0646       | 76.7868        | <i>I. semipalmata, I. yadera</i>        |
| <b><i>Idukki district</i></b>      |                      |               |                |                                         |
| Eravikulam NP, Anamudi             | 2310                 | 10.1750       | 77.0697        | <i>S. leptodactyla</i>                  |
| Eravikulam NP                      | 2105                 | 10.1846       | 77.0900        | <i>S. leptodactyla</i>                  |
| Eravikulam NP, Vagvarai            | 1798                 | 10.1753       | 77.0948        | <i>S. leptodactyla</i>                  |
| Kattapana, Double cut              | 1082                 | 09.8282       | 77.0175        | <i>I. semipalmata</i>                   |
| Kulamav                            | 440                  | 09.8444       | 76.8722        | <i>I. semipalmata</i>                   |
| Munnar, Kadalar                    | 1429                 | 10.1311       | 77.0005        | <i>I. brachytarsus</i>                  |
| Munnar                             | 1450                 | 10.0847       | 77.0586        | <i>S. leptodactyla</i>                  |
| Mattupetti                         | 1578                 | 10.1042       | 77.1211        | <i>S. leptodactyla</i>                  |
| Pampadumpara                       | 1025                 | 09.8010       | 77.1540        | <i>I. semipalmata</i>                   |
| Methooty                           | 443                  | 09.8416       | 76.8704        | <i>I. brachytarsus, I. yadera</i>       |
| Anchuruli, Periyar TR              | 929                  | 09.5873       | 77.1520        | <i>I. brachytarsus</i>                  |
| Thekkady, Periyar TR               | 980                  | 09.5803       | 77.1593        | <i>I. brachytarsus, I. semipalmata</i>  |
| Upper Manalar, Periyar TR          | 1508                 | 09.5958       | 77.3456        | <i>I. brachytarsus</i>                  |
| <b><i>Kannur district</i></b>      |                      |               |                |                                         |
| Aralam WLS                         | 66                   | 11.9221       | 75.7913        | <i>I. gundia</i>                        |
| Aralam WLS, Meenmutty              | 358                  | 11.9384       | 75.8573        | <i>I. gundia</i>                        |
| <b><i>Kollam district</i></b>      |                      |               |                |                                         |
| Kattilappara, Shendurney WLS       | 130                  | 08.9179       | 77.0953        | <i>I. brachytarsus</i>                  |
| Pandimotta, Shendurney WLS         | 741                  | 08.8502       | 77.1801        | <i>S. diplosticta</i>                   |
| Pandimotta, Shendurney WLS         | 1222                 | 08.8271       | 77.2165        | <i>I. brachytarsus</i>                  |
| <b><i>Kottayam district</i></b>    |                      |               |                |                                         |
| Valanjamkanam falls                | 875                  | 08.5629       | 76.9778        | <i>I. brachytarsus</i>                  |
| <b><i>Kozhikode district</i></b>   |                      |               |                |                                         |
| Kakkayam                           | 752                  | 11.5542       | 75.9196        | <i>I. beddomii</i>                      |
| <b><i>Palakkad district</i></b>    |                      |               |                |                                         |

|                                    |      |         |         |                                                      |
|------------------------------------|------|---------|---------|------------------------------------------------------|
| Nelliampathy, Kaikatti             | 965  | 10.5373 | 76.6764 | <i>I. brachytarsus, I. semipalmata</i>               |
| Nelliampathy, Kesavapara           | 923  | 10.5243 | 76.6673 | <i>I. brachytarsus</i>                               |
| Nelliampathy, Pakuthipaalam        | 980  | 10.4797 | 76.6736 | <i>I. semipalmata</i>                                |
| Nenmara                            | 648  | 10.5289 | 76.6660 | <i>I. brachytarsus, I. semipalmata</i>               |
| Parambikulam TR                    | 544  | 10.4453 | 76.8130 | <i>I. brachytarsus</i>                               |
| Parambikulam TR                    | 546  | 10.4372 | 76.7801 | <i>I. semipalmata</i>                                |
| Parambikulam TR, Poopara           | 955  | 10.3516 | 76.8215 | <i>I. brachytarsus</i>                               |
| Sairandhri, Silent Valley          | 962  | 11.0949 | 76.4505 | <i>I. beddomii</i>                                   |
| Siruvani, Kuddam                   | 826  | 10.9795 | 76.6151 | <i>I. beddomii</i>                                   |
| Siruvani, Pattiar                  | 908  | 10.9696 | 76.6545 | <i>I. beddomii</i>                                   |
| Siruvani, Singappara               | 856  | 10.9798 | 76.6150 | <i>I. semipalmata</i>                                |
| <b>Pathanamthitta district</b>     |      |         |         |                                                      |
| Gavi                               | 1107 | 09.4192 | 77.1517 | <i>I. brachytarsus, I. semipalmata</i>               |
| Kozhikana, Periyar TR              | 947  | 09.4901 | 77.1363 | <i>I. yadera</i>                                     |
| Nilakkal                           | 112  | 09.3724 | 76.9898 | <i>I. yadera</i>                                     |
| <b>Thiruvananthapuram district</b> |      |         |         |                                                      |
| Athirimala                         | 993  | 08.6178 | 77.2297 | <i>I. brachytarsus, S. diplosticta</i>               |
| Athirimala                         | 1425 | 08.6238 | 77.2454 | <i>S. diplosticta</i>                                |
| Chathankod                         | 140  | 08.6593 | 77.1494 | <i>I. brachytarsus</i>                               |
| Chathankod–Bonnacaud               | 488  | 08.6737 | 77.1575 | <i>I. brachytarsus, I. sarojamma, I. semipalmata</i> |
| Kallar                             | 140  | 08.7108 | 77.1293 | <i>I. semipalmata</i>                                |
| Ponmudi                            | 1014 | 08.7682 | 77.1101 | <i>I. brachytarsus, I. sarojamma, S. diplosticta</i> |
| Ponkalapara                        | 1370 | 08.6247 | 77.2425 | <i>I. brachytarsus, S. leptodactyla</i>              |
| Pandipath                          | 1308 | 08.6810 | 77.1924 | <i>S. diplosticta</i>                                |
| <b>Thrissur district</b>           |      |         |         |                                                      |
| Vazhachal                          | 533  | 10.2814 | 76.6904 | <i>I. brachytarsus, I. yadera</i>                    |
| Vazhachal                          | 577  | 10.2838 | 76.6851 | <i>I. brachytarsus</i>                               |
| Peechi-Vazhani WLS                 | 460  | 10.5032 | 76.4653 | <i>I. brachytarsus</i>                               |
| <b>Wayanad district</b>            |      |         |         |                                                      |
| Settukunnu                         | 823  | 11.6172 | 75.9913 | <i>I. beddomii, I. paramakri</i>                     |
| Suganthagiri                       | 852  | 11.5386 | 76.0539 | <i>I. beddomii, I. paramakri</i>                     |
| <b>Karnataka</b>                   |      |         |         |                                                      |
| <b>Chikmagalur district</b>        |      |         |         |                                                      |
| Bygoor                             | 1042 | 13.3111 | 75.6128 | <i>I. duboisi</i>                                    |
| Charmadi Ghats                     | 489  | 13.0753 | 75.4552 | <i>I. duboisi</i>                                    |
| Charmadi Ghats                     | 608  | 13.0798 | 75.4650 | <i>I. duboisi</i>                                    |
| Charmadi Ghats                     | 746  | 13.0982 | 75.4793 | <i>I. duboisi</i>                                    |
| Charmadi Ghats                     | 826  | 13.1113 | 75.4883 | <i>I. tysoni</i>                                     |
| Muthodi, Bhadra WLS                | 1105 | 13.3688 | 75.6566 | <i>I. bhadrai</i>                                    |
| <b>Dakshin Kannada district</b>    |      |         |         |                                                      |
| Gundia                             | 130  | 12.8280 | 75.5715 | <i>I. gundia</i>                                     |
| Gundia                             | 128  | 12.8250 | 75.5690 | <i>I. gundia</i>                                     |
| Gundia                             | 224  | 12.8290 | 75.6070 | <i>I. gundia</i>                                     |
| Gundia–Kempholey                   | 650  | 12.8567 | 75.6955 | <i>I. duboisi</i>                                    |
| <b>Hassan district</b>             |      |         |         |                                                      |
| Kempholey                          | 800  | 12.8706 | 75.7053 | <i>I. duboisi</i>                                    |
| Kempholey                          | 880  | 12.8567 | 75.6955 | <i>I. gundia</i>                                     |
| Kottigehara                        | 798  | 13.1230 | 75.4954 | <i>I. duboisi</i>                                    |
| <b>Kodagu district</b>             |      |         |         |                                                      |
| Monnangeri                         | 250  | 12.4696 | 75.6094 | <i>I. gundia</i>                                     |
| Bhagamandala                       | 889  | 12.3856 | 75.5343 | <i>I. tysoni</i>                                     |
| Madikeri, Abby falls               | 1085 | 12.4568 | 75.7106 | <i>I. tysoni</i>                                     |
| Thalakaveri                        | 1183 | 12.3857 | 75.5026 | <i>I. tysoni</i>                                     |
| Yavakapady, Coorg                  | 1176 | 12.2201 | 75.6557 | <i>I. tysoni</i>                                     |
| <b>Shimoga district</b>            |      |         |         |                                                      |
| Agumbe                             | 670  | 13.5170 | 75.0883 | <i>I. duboisi</i>                                    |
| Jog falls                          | 600  | 13.4421 | 75.1704 | <i>I. salelkari</i>                                  |

|                                       |      |         |         |                     |
|---------------------------------------|------|---------|---------|---------------------|
| <b><i>Udupi district</i></b>          |      |         |         |                     |
| Kudremukh                             | 745  | 13.2853 | 75.1420 | <i>I. gundia</i>    |
| <b><i>Uttara Kannada district</i></b> |      |         |         |                     |
| Castle rock                           | 577  | 15.5217 | 74.3823 | <i>I. duboisi</i>   |
| Dandeli                               | 494  | 15.1669 | 74.6323 | <i>I. salelkari</i> |
| Kathlekan                             | 554  | 14.2739 | 74.7469 | <i>I. duboisi</i>   |
| Unchali falls                         | 444  | 14.4091 | 74.7468 | <i>I. salelkari</i> |
| <b>Maharashtra</b>                    |      |         |         |                     |
| <b><i>Pune district</i></b>           |      |         |         |                     |
| Bhimashankar                          | 972  | 19.0681 | 73.6047 | <i>I. leithii</i>   |
| <b><i>Raigad district</i></b>         |      |         |         |                     |
| Matheran                              | 749  | 18.9800 | 73.2700 | <i>I. leithii</i>   |
| Matheran                              | 819  | 18.9869 | 73.2708 | <i>I. leithii</i>   |
| Phansad                               | 221  | 18.4551 | 72.9262 | <i>I. chiravasi</i> |
| <b><i>Satara district</i></b>         |      |         |         |                     |
| Humbarli, Koyna                       | 827  | 17.4033 | 73.7367 | <i>I. chiravasi</i> |
| Koyna Nagar                           | 941  | 17.4163 | 73.7252 | <i>I. chiravasi</i> |
| Koyna Nagar                           | 998  | 17.4162 | 73.7294 | <i>I. chiravasi</i> |
| Mahabaleshwar, Dhobi falls            | 1235 | 17.9172 | 73.6536 | <i>I. leithii</i>   |
| <b><i>Sindhudurg district</i></b>     |      |         |         |                     |
| Amboli                                | 719  | 15.9599 | 73.9973 | <i>I. chiravasi</i> |
| Amboli                                | 733  | 15.9691 | 73.9882 | <i>I. chiravasi</i> |
| Amboli                                | 744  | 15.9560 | 73.9970 | <i>I. chiravasi</i> |
