# Supplementary material for: Molecular and Morphological Study of Leaping Frogs (Anura, Ranixalidae) with Description of Two New Species
Source: PubMed Central journal article supplement (PMC5112961; doi:10.1371/journal.pone.0166326), 2016-11-16
Supplement: pone.0166326.s012.pdf [file pone.0166326.s012.pdf]

**Molecular and morphological study of Leaping frogs (Anura, Ranixalidae) with description of two new species**

Sonali Garg, SD Biju

**S2 Table. List of DNA sequences included in the study.**

| Family/Species                   | Collection Locality                  | Voucher No.     | Accession nos.        | Reference                    |
|----------------------------------|--------------------------------------|-----------------|-----------------------|------------------------------|
| <b>Ranixalidae</b>               |                                      |                 |                       |                              |
| <i>Indirana beddomii</i>         | Kakkayam, Kerala                     | SDBDU 2010.225  | KX966028              | This study                   |
|                                  | Sairandhri, Silent Valley, Kerala    | SDBDU 2011.958  | KX966029              | This study                   |
|                                  | Sairandhri, Silent Valley, Kerala    | SDBDU 2011.960  | KX966030,<br>KX966163 | This study                   |
|                                  | Settukunu, Wayanad, Kerala           | SDBDU 2011.850  | KX966031              | This study                   |
|                                  | Siruvani, Kuddam, Kerala             | SDBDU 2011.1269 | KX966032              | This study                   |
|                                  | Siruvani, Kuddam, Kerala             | SDBDU 2011.1270 | KX966033              | This study                   |
|                                  | Siruvani, Pattiar, Kerala            | SDBDU 2011.1256 | KX966034              | This study                   |
|                                  | Suganthagiri, Wayanad, Kerala        | SDBDU 2005.1232 | KX966035              | This study                   |
|                                  | Peruvannamuzhi                       | WILD-14-AMP-411 | KX641759              | Dahanukar <i>et al.</i> 2016 |
|                                  | Peruvannamuzhi                       | WILD-14-AMP-414 | KX641760              | Dahanukar <i>et al.</i> 2016 |
|                                  | Peruvannamuzhi                       | WILD-14-AMP-420 | KX641761              | Dahanukar <i>et al.</i> 2016 |
|                                  | Kunthipuzha                          | WILD-14-AMP-421 | KX641762              | Dahanukar <i>et al.</i> 2016 |
|                                  | Aralam                               | WILD-13-AMP-138 | KX641763              | Dahanukar <i>et al.</i> 2016 |
|                                  | Sairandhri                           | WILD-14-AMP-409 | KX641764              | Dahanukar <i>et al.</i> 2016 |
|                                  | Kakkayam                             | WILD-14-AMP-413 | KX641765              | Dahanukar <i>et al.</i> 2016 |
|                                  | –                                    | AA87            | JQ596658              | Nair <i>et al.</i> 2012      |
|                                  | –                                    | AA88            | JQ596659              | Nair <i>et al.</i> 2012      |
|                                  | –                                    | AA89            | JQ596660              | Nair <i>et al.</i> 2012      |
|                                  | –                                    | AA95            | JQ596661              | Nair <i>et al.</i> 2012      |
|                                  | –                                    | AA99            | JQ596662              | Nair <i>et al.</i> 2012      |
|                                  | Ooty                                 | –               | AF215392              | Vences 2000                  |
|                                  | India                                | IN1 5411        | KF991280              | Barej <i>et al.</i> 2014     |
| <i>Indirana bhadrai</i> sp. nov. | Muthodi, Bhadra WLS, Karnataka       | ZSI/WGRC/V/A887 | KX966036,<br>KX966164 | This study                   |
| <i>Indirana brachytarsus</i>     | Anchurulli, Periyar TR, Kerala       | SDBDU 2006.4800 | KX966037              | This study                   |
|                                  | Anchurulli, Periyar TR, Kerala       | SDBDU 2009.2513 | KX966038              | This study                   |
|                                  | Athirimala, Kerala                   | SDBDU 2007.4323 | KX966039              | This study                   |
|                                  | Bonnacaud, Kerala                    | SDBDU 2014.2662 | KX966040              | This study                   |
|                                  | Chathankod, Kerala                   | SDBDU 2005.1231 | KX966041              | This study                   |
|                                  | Chathankod–Bonnacaud, Kerala         | SDBDU 2015.2931 | KX966042              | This study                   |
|                                  | Chathankod–Bonnacaud, Kerala         | SDBDU 2015.2932 | KX966043              | This study                   |
|                                  | Gavi, Kerala                         | SDBDU 2006.4867 | KX966044              | This study                   |
|                                  | Gavi, Kerala                         | SDBDU 2009.2501 | KX966045              | This study                   |
|                                  | Kadalar, Munnar, Kerala              | SDBDU 2011.1046 | KX966046              | This study                   |
|                                  | Kadalar, Munnar, Kerala              | SDBDU 2012.814  | KX966047              | This study                   |
|                                  | Kadalar, Munnar, Kerala              | SDBDU 2012.870  | KX966048              | This study                   |
|                                  | Kaikatti, Nelliampathy, Kerala       | SDBDU 2010.254  | KX966049              | This study                   |
|                                  | Kattilappara, Shendurney WLS, Kerala | SDBDU 2011.276  | KX966050              | This study                   |
|                                  | Kesavapara, Nelliampathy, Kerala     | SDBDU 2011.1181 | KX966051              | This study                   |
|                                  | Kesavapara, Nelliampathy, Kerala     | SDBDU 2011.1182 | KX966052              | This study                   |
|                                  | Kesavapara, Nelliampathy, Kerala     | SDBDU 2011.1183 | KX966053              | This study                   |

|                           |                                        |                   |                    |                              |
|---------------------------|----------------------------------------|-------------------|--------------------|------------------------------|
|                           | Kerala                                 |                   |                    |                              |
|                           | Valanjamkanam falls, Kerala            | SDBDU 2008.329    | KX966054           | This study                   |
|                           | Upper Manalar, Periyar TR, Kerala      | SDBDU 2015.2995   | KX966055           | This study                   |
|                           | Methooty, Kerala                       | SDBDU 2011.2731   | KX966056           | This study                   |
|                           | Methooty, Kerala                       | SDBDU 2011.2741   | KX966057           | This study                   |
|                           | Methooty, Kerala                       | SDBDU 2011.2747   | KX966058           | This study                   |
|                           | Methooty, Kerala                       | SDBDU 2013.2287   | KX966059           | This study                   |
|                           | Methooty, Kerala                       | SDBDU 2014.2686   | KX966060           | This study                   |
|                           | Nenmara, Kerala                        | SDBDU 2011.1132   | KX966061           | This study                   |
|                           | Pandimotta, Shendurney WLS, Kerala     | SDBDU 2011.280    | KX966062           | This study                   |
|                           | Pandimotta, Shendurney WLS, Kerala     | SDBDU 2011.281    | KX966063           | This study                   |
|                           | Parambikulam TR, Kerala                | SDBDU 2011.541    | KX966064           | This study                   |
|                           | Peechi-Vazhani WLS, Kerala             | SDBDU 2005.1251   | KX966065           | This study                   |
|                           | Ponkalapara, Kerala                    | SDBDU 2007.4327   | KX966066           | This study                   |
|                           | Ponkalapara, Kerala                    | SDBDU 2007.4329   | KX966067           | This study                   |
|                           | Ponmudi, Kerala                        | SDBDU 2008.1776   | KX966068           | This study                   |
|                           | Poopara, Parambikulam TR, Kerala       | SDBDU 2011.549    | KX966069           | This study                   |
|                           | Thekkady, Periyar TR, Kerala           | SDBDU 2012.1825   | KX966070           | This study                   |
|                           | Thekkady, Periyar TR, Kerala           | SDBDU 2012.1828   | KX966071           | This study                   |
|                           | Vazhachal, Kerala                      | SDBDU 2015.3156   | KX966072           | This study                   |
|                           | Vazhachal, Kerala                      | SDBDU 2015.3160   | KX966073           | This study                   |
|                           | Glenback estate, Kiriparai, Tamil Nadu | SDBDU 2008.1936   | KX966074           | This study                   |
|                           | Kakkachi, Tamil Nadu                   | SDBDU 2008.2014   | KX966075           | This study                   |
|                           | Kakkachi, Tamil Nadu                   | SDBDU 2002.4091   | KX966076           | This study                   |
|                           | Valparai, Andiparai shola, Tamil Nadu  | SDBDU 2011.549A   | KX966077, KX966165 | This study                   |
|                           | –                                      | AA72              | JQ596642           | Nair <i>et al.</i> 2012      |
|                           | –                                      | AA75              | JQ596643           | Nair <i>et al.</i> 2012      |
|                           | –                                      | AA77              | JQ596644           | Nair <i>et al.</i> 2012      |
|                           | –                                      | AA23              | JQ596645           | Nair <i>et al.</i> 2012      |
|                           | –                                      | AA71              | JQ596646           | Nair <i>et al.</i> 2012      |
|                           | –                                      | AA638             | JQ596647           | Nair <i>et al.</i> 2012      |
|                           | India                                  | IN-2 isolate 5412 | KF991281           | Barej <i>et al.</i> 2014     |
|                           | India                                  | KR-2003           | AY322298           | Roelants <i>et al.</i> 2004  |
|                           | Neyyar                                 | WILD-13-AMP-234   | KX641766           | Dahanukar <i>et al.</i> 2016 |
|                           | Ponmudi                                | WILD-13-AMP-301   | KX641767           | Dahanukar <i>et al.</i> 2016 |
|                           | Painavu                                | WILD-14-AMP-358   | KX641768           | Dahanukar <i>et al.</i> 2016 |
|                           | Vellakkamaly                           | WILD-14-AMP-437   | KX641769           | Dahanukar <i>et al.</i> 2016 |
|                           | Chimmony                               | WILD-14-AMP-475   | KX641770           | Dahanukar <i>et al.</i> 2016 |
|                           | Chimmony                               | WILD-14-AMP-477   | KX641771           | Dahanukar <i>et al.</i> 2016 |
|                           | Peechi-Vazhani                         | WILD-14-AMP-478   | KX641772           | Dahanukar <i>et al.</i> 2016 |
|                           | Topslip                                | WILD-15-AMP-609   | KX641773           | Dahanukar <i>et al.</i> 2016 |
|                           | Ponmudi                                | WILD-13-AMP-241   | KX641774           | Dahanukar <i>et al.</i> 2016 |
|                           | Neyyar                                 | WILD-13-AMP-247   | KX641775           | Dahanukar <i>et al.</i> 2016 |
|                           | Ponmudi                                | WILD-13-AMP-285   | KX641776           | Dahanukar <i>et al.</i> 2016 |
|                           | Ponmudi                                | WILD-13-AMP-293   | KX641777           | Dahanukar <i>et al.</i> 2016 |
|                           | Painavu                                | WILD-14-AMP-359   | KX641778           | Dahanukar <i>et al.</i> 2016 |
|                           | Vellakkamaly                           | WILD-14-AMP-442   | KX641779           | Dahanukar <i>et al.</i> 2016 |
|                           | Kodaikanal                             | –                 | AF215391           | Vences 2000                  |
| <i>Indirana chiravasi</i> | Amboli, Maharashtra                    | SDBDU 2004.4511   | KX966078           | This study                   |
|                           | Amboli, Maharashtra                    | SDBDU 2006.1431   | KX966079           | This study                   |
|                           | Amboli, Maharashtra                    | SDBDU 2012.2112   | KX966080, KX966166 | This study                   |
|                           | Amboli, Maharashtra                    | SDBDU 2012.2114   | KX966081           | This study                   |

|                         |                               |                 |                       |                              |
|-------------------------|-------------------------------|-----------------|-----------------------|------------------------------|
|                         | Amboli, Maharashtra           | SDBDU 2012.2124 | KX966082              | This study                   |
|                         | Amboli, Maharashtra           | SDBDU 2014.2483 | KX966083              | This study                   |
|                         | Amboli, Maharashtra           | SDBDU 2015.3086 | KX966084              | This study                   |
|                         | Amboli, Maharashtra           | BNHS 5890       | KM386531              | Padhye <i>et al.</i> 2014    |
|                         | Amboli, Maharashtra           | WILD-14-AMP-489 | KM386530              | Padhye <i>et al.</i> 2014    |
|                         | Koyna, Maharashtra            | SDBDU 2004.4506 | KX966085              | This study                   |
|                         | Koyna, Maharashtra            | SDBDU 2006.1420 | KX966086              | This study                   |
|                         | Koyna, Maharashtra            | SDBDU 2007.6046 | KX966087              | This study                   |
|                         | Koyna, Maharashtra            | SDBDU 2010.372  | KX966088              | This study                   |
|                         | Phansad, Maharashtra          | SDBDU 2011.1448 | KX966089              | This study                   |
|                         | Koyna                         | WILD-15-AMP-530 | KX641780              | Dahanukar <i>et al.</i> 2016 |
|                         | Chandoli                      | WILD-15-AMP-535 | KX641781              | Dahanukar <i>et al.</i> 2016 |
|                         | Kitawade                      | WILD-15-AMP-612 | KX641782              | Dahanukar <i>et al.</i> 2016 |
| <i>Indirana duboisi</i> | Agumbe, Karnataka             | SDBDU 2014.2516 | KX966090              | This study                   |
|                         | Bygoor, Karnataka             | SDBDU 2011.510  | KX966091              | This study                   |
|                         | Charmadi Ghat, Karnataka      | SDBDU 2011.519  | KX966092              | This study                   |
|                         | Charmadi Ghats, Karnataka     | SDBDU 2011.1398 | KX966093              | This study                   |
|                         | Charmadi Ghats, Karnataka     | SDBDU 2011.1399 | KX966094              | This study                   |
|                         | Gundia-Kempholey, Karnataka   | SDBDU 2003.1086 | KX966095,<br>KX966167 | This study                   |
|                         | Kathlekan, Karnataka          | SDBDU 2011.1366 | KX966096              | This study                   |
|                         | Kempholey, Karnataka          | SDBDU 2011.51   | KX966097              | This study                   |
|                         | Kottigehara, Karnataka        | SDBDU 2010.128  | KX966098              | This study                   |
|                         | Shirva, Karnataka             | RBRL 060715-02  | AB530593              | Hasan <i>et al.</i> 2014     |
|                         | –                             | AA200           | JQ596663              | Nair <i>et al.</i> 2012      |
|                         | –                             | AA220           | JQ596664              | Nair <i>et al.</i> 2012      |
|                         | –                             | AA227           | JQ596665              | Nair <i>et al.</i> 2012      |
|                         | –                             | AA230           | JQ596666              | Nair <i>et al.</i> 2012      |
|                         | –                             | AA231           | JQ596667              | Nair <i>et al.</i> 2012      |
|                         | India                         | FB2000b         | AF249064              | Bossuyt & Milinkovitch 2000  |
|                         | Mookambika                    | WILD-15-AMP-630 | KX641815              | Dahanukar <i>et al.</i> 2016 |
|                         | Mookambika                    | WILD-15-AMP-631 | KX641816              | Dahanukar <i>et al.</i> 2016 |
|                         | Muduba                        | BNHS 5980       | KX641817              | Dahanukar <i>et al.</i> 2016 |
| <i>Indirana gundia</i>  | Aralam WLS, Kerala            | SDBDU 2011.1056 | KX966099              | This study                   |
|                         | Aralam WLS, Meenmuthy, Kerala | SDBDU 2008.432  | KX966100              | This study                   |
|                         | Gundia, Karnataka             | SDBDU 2010.007  | KX966101              | This study                   |
|                         | Gundya, Karnataka             | WILD-14-AMP-499 | KM386532              | Dahanukar <i>et al.</i> 2016 |
|                         | Gundya, Karnataka             | WILD-14-AMP-500 | KM386533              | Dahanukar <i>et al.</i> 2016 |
|                         | Kempholey, Karnataka          | SDBDU 2008.433  | KX966102,<br>KX966168 | This study                   |
|                         | Monnangeri, Karnataka         | SDBDU 2006.1436 | KX966103              | This study                   |
|                         | Monnangeri, Karnataka         | SDBDU 2006.1438 | KX966104              | This study                   |
|                         | –                             | AA175           | JQ596648              | Nair <i>et al.</i> 2012      |
|                         | –                             | AA178           | JQ596649              | Nair <i>et al.</i> 2012      |
|                         | –                             | AA180           | JQ596650              | Nair <i>et al.</i> 2012      |
|                         | –                             | AA189           | JQ596651              | Nair <i>et al.</i> 2012      |
|                         | –                             | AA193           | JQ596652              | Nair <i>et al.</i> 2012      |
|                         | Aralam                        | WILD-13-AMP-139 | KX641783              | Dahanukar <i>et al.</i> 2016 |
|                         | Coorg                         | WILD-13-AMP-210 | KX641784              | Dahanukar <i>et al.</i> 2016 |
|                         | Kutta                         | WILD-13-AMP-211 | KX641785              | Dahanukar <i>et al.</i> 2016 |
|                         | Aralam                        | WILD-13-AMP-136 | KX641786              | Dahanukar <i>et al.</i> 2016 |
|                         | Ranipuram                     | WILD-15-AMP-614 | KX641787              | Dahanukar <i>et al.</i> 2016 |
|                         | Ranipuram                     | WILD-15-AMP-616 | KX641788              | Dahanukar <i>et al.</i> 2016 |
|                         | Ranipuram                     | WILD-15-AMP-618 | KX641789              | Dahanukar <i>et al.</i> 2016 |
|                         | Subramanya Sullya             | WILD-16-AMP-649 | KX641790              | Dahanukar <i>et al.</i> 2016 |
| <i>Indirana leithii</i> | Bhimashankar, Maharashtra     | SDBDU 2011.1100 | KX966105              | This study                   |
|                         | Dhobi falls, Mahabaleshwar,   | SDBDU 2007.6062 | KX966106              | This study                   |

|                                       |                               |                         |                       |                              |
|---------------------------------------|-------------------------------|-------------------------|-----------------------|------------------------------|
|                                       | Maharashtra                   |                         |                       |                              |
|                                       | Matheran, Maharashtra         | SDBDU 2005.1237         | KX966107              | This study                   |
|                                       | Matheran, Maharashtra         | SDBDU 2012.2094         | KX966108,<br>KX966169 | This study                   |
|                                       | Matheran, Maharashtra         | SDBDU 2014.2513         | KX966109              | This study                   |
|                                       | Matheran, Maharashtra         | BNHS 5590               | KF590637              | Modak <i>et al.</i> 2014     |
|                                       | Matheran, Maharashtra         | BNHS 5591               | KF590638              | Modak <i>et al.</i> 2014     |
|                                       | Ratangad, Maharashtra         | AGCZRL-<br>Amphibia-112 | KF590645              | Modak <i>et al.</i> 2014     |
|                                       | Ratangad, Maharashtra         | AGCZRL-<br>Amphibia-113 | KF590646              | Modak <i>et al.</i> 2014     |
|                                       | Harishchandragad, Maharashtra | WILD-013-AMP-<br>173    | KF590639              | Modak <i>et al.</i> 2014     |
|                                       | Harishchandragad, Maharashtra | WILD-013-AMP-<br>174    | KF590640              | Modak <i>et al.</i> 2014     |
|                                       | Tamhini, Maharashtra          | WILD-013-AMP-<br>175    | KF590641              | Modak <i>et al.</i> 2014     |
|                                       | Tamhini, Maharashtra          | WILD-013-AMP-<br>176    | KF590642              | Modak <i>et al.</i> 2014     |
|                                       | Koynanagar, Maharashtra       | WILD-013-AMP-<br>177    | KF590643              | Modak <i>et al.</i> 2014     |
|                                       | Visapur, Maharashtra          | WILD-013-AMP-<br>178    | KF590644              | Modak <i>et al.</i> 2014     |
|                                       | Karnala                       | WILD-15-AMP-525         | KX641791              | Dahanukar <i>et al.</i> 2016 |
|                                       | Javalya fort                  | AGCZRL-<br>Amphibia-549 | KX641792              | Dahanukar <i>et al.</i> 2016 |
|                                       | Achala fort                   | AGCZRL-<br>Amphibia-548 | KX641793              | Dahanukar <i>et al.</i> 2016 |
|                                       | Ahwa Dang                     | AGCZRL-<br>Amphibia-552 | KX641794              | Dahanukar <i>et al.</i> 2016 |
|                                       | Ahwa Dang                     | AGCZRL-<br>Amphibia-555 | KX641795              | Dahanukar <i>et al.</i> 2016 |
| <i>Indirana paramakri</i> sp.<br>nov. | Settukunnu, Wayanad, Kerala   | ZSI/WGRC/V/A889         | KX966110,<br>KX966170 | This study                   |
|                                       | Suganthagiri, Wayanad, Kerala | ZSI/WGRC/V/A890         | KX966111              | This study                   |
|                                       | Suganthagiri, Wayanad, Kerala | SDBDU 2005.3740         | KX966112              | This study                   |
|                                       | –                             | AA91                    | JQ596653              | Nair <i>et al.</i> 2012      |
|                                       | –                             | AA92                    | JQ596654              | Nair <i>et al.</i> 2012      |
|                                       | –                             | AA93                    | JQ596655              | Nair <i>et al.</i> 2012      |
|                                       | –                             | AA94                    | JQ596656              | Nair <i>et al.</i> 2012      |
|                                       | –                             | AA98                    | JQ596657              | Nair <i>et al.</i> 2012      |
| <i>Indirana salelkari</i>             | Dandeli, Karnataka            | SDBDU 2011.1330         | KX966113,<br>KX966171 | This study                   |
|                                       | Jog falls, Karnataka          | SDBDU 2003.40180        | KX966114              | This study                   |
|                                       | Unchali falls, Karnataka      | SDBDU 2012.1316         | KX966115              | This study                   |
|                                       | Neturlim, Sanguem, Karnataka  | BNHS 5931               | KP826824              | Modak <i>et al.</i> 2015     |
|                                       | Neturlim, Sanguem, Karnataka  | WILD-15-AMP-551         | KP826825              | Modak <i>et al.</i> 2015     |
|                                       | Neturlim, Sanguem, Karnataka  | AGCZRL Amphibia<br>210  | KP826826              | Modak <i>et al.</i> 2015     |
| <i>Indirana sarojamma</i>             | Chathankod–Bonnacaud, Kerala  | SDBDU 2002.516          | KX966116              | This study                   |
|                                       | Ponmudi, Kerala               | SDBDU 2005.1245         | KX966117              | This study                   |
|                                       | Ponmudi, Kerala               | SDBDU 2013.2310         | KX966118,<br>KX966172 | This study                   |
|                                       | –                             | AA800                   | JQ596677              | Nair <i>et al.</i> 2012      |
|                                       | Ponmudi                       | BNHS 5981               | KX641796              | Dahanukar <i>et al.</i> 2016 |
| <i>Indirana semipalmata</i>           | Chathankod–Bonnacaud, Kerala  | SDBDU 2002.520          | KX966119              | This study                   |
|                                       | Double cut, Kattapana, Kerala | SDBDU 2008.443          | KX966120              | This study                   |
|                                       | Gavi, Kerala                  | SDBDU 2006.4819         | KX966121,<br>KX966173 | This study                   |

|                        |                                     |                  |                       |                              |
|------------------------|-------------------------------------|------------------|-----------------------|------------------------------|
|                        | Kaikatti, Nelliampathy, Kerala      | SDBDU 2005.26    | KX966122              | This study                   |
|                        | Kallar, Kerala                      | SDBDU 2006.4773A | KX966123              | This study                   |
|                        | Kallar, Kerala                      | SDBDU 2006.4773B | KX966124              | This study                   |
|                        | Kulamav, Kerala                     | SDBDU 2010.201   | KX966125              | This study                   |
|                        | Nenmara, Kerala                     | SDBDU 2011.1133  | KX966126              | This study                   |
|                        | Neriamangalam, Kerala               | SDBDU 2011.1125  | KX966127              | This study                   |
|                        | Pakuthipaalam, Nelliampathy, Kerala | SDBDU 2002.527   | KX966128              | This study                   |
|                        | Pampadumpara, Kerala                | SDBDU 2008.337   | KX966129              | This study                   |
|                        | Parambikulam TR, Kerala             | SDBDU 2015.3033  | KX966130              | This study                   |
|                        | Siruvani, Singappara, Kerala        | SDBDU 2015.3014  | KX966131              | This study                   |
|                        | Thekkady, Periyar TR, Kerala        | SDBDU 2012.1824  | KX966132              | This study                   |
|                        | Top Slip, Karian Shola, Tamil Nadu  | SDBDU 2005.11    | KX966133              | This study                   |
|                        | –                                   | AA255            | JQ596670              | Nair <i>et al.</i> 2012      |
|                        | –                                   | AA256            | JQ596671              | Nair <i>et al.</i> 2012      |
|                        | –                                   | AA257            | JQ596672              | Nair <i>et al.</i> 2012      |
|                        | –                                   | AA243            | JQ596668              | Nair <i>et al.</i> 2012      |
|                        | –                                   | AA245            | JQ596669              | Nair <i>et al.</i> 2012      |
|                        | Sholayar                            | WILD-15-AMP-610  | KX641797              | Dahanukar <i>et al.</i> 2016 |
|                        | Sholayar                            | WILD-15-AMP-611  | KX641798              | Dahanukar <i>et al.</i> 2016 |
|                        | Kunthipuzha                         | WILD-14-AMP-419  | KX641799              | Dahanukar <i>et al.</i> 2016 |
|                        | Kizhukanam                          | WILD-14-AMP-438  | KX641800              | Dahanukar <i>et al.</i> 2016 |
|                        | Shendurney                          | WILD-13-AMP-269  | KX641801              | Dahanukar <i>et al.</i> 2016 |
|                        | Shendurney                          | WILD-13-AMP-270  | KX641802              | Dahanukar <i>et al.</i> 2016 |
|                        | Shendurney                          | WILD-13-AMP-271  | KX641803              | Dahanukar <i>et al.</i> 2016 |
|                        | Shendurney                          | WILD-13-AMP-296  | KX641804              | Dahanukar <i>et al.</i> 2016 |
|                        | Idukki                              | WILD-14-AMP-351  | KX641805              | Dahanukar <i>et al.</i> 2016 |
|                        | Silent Valley                       | WILD-14-AMP-416  | KX641806              | Dahanukar <i>et al.</i> 2016 |
|                        | Peechi-Vazhani                      | WILD-14-AMP-470  | KX641807              | Dahanukar <i>et al.</i> 2016 |
|                        | Chimmony                            | WILD-14-AMP-471  | KX641808              | Dahanukar <i>et al.</i> 2016 |
|                        | Peechi-Vazhani                      | WILD-14-AMP-472  | KX641809              | Dahanukar <i>et al.</i> 2016 |
|                        | Chimmony                            | WILD-14-AMP-473  | KX641810              | Dahanukar <i>et al.</i> 2016 |
|                        | Chimmony                            | WILD-14-AMP-474  | KX641811              | Dahanukar <i>et al.</i> 2016 |
|                        | Parambikulam                        | WILD-14-AMP-503  | KX641812              | Dahanukar <i>et al.</i> 2016 |
|                        | Painavu                             | WILD-14-AMP-354  | KX641813              | Dahanukar <i>et al.</i> 2016 |
|                        | Idukki                              | WILD-14-AMP-440  | KX641814              | Dahanukar <i>et al.</i> 2016 |
| <i>Indirana tysoni</i> | Bhagamandla, Karnataka              | SDBDU 2012.102   | KX966134              | This study                   |
|                        | Charmadi Ghats, Karnataka           | SDBDU 2011.1395  | KX966135              | This study                   |
|                        | Madikeri, Abby falls, Karnataka     | SDBDU 2006.1443  | KX966136              | This study                   |
|                        | Thalakaveri, Karnataka              | SDBDU 2007.5093  | KX966137              | This study                   |
|                        | Yavakapady, Coorg, Karnataka        | SDBDU 2012.2228  | KX966138              | This study                   |
|                        | Yavakapady, Coorg, Karnataka        | SDBDU 2012.74    | KX966139,<br>KX966174 | This study                   |
|                        | Ranipuram                           | BNHS 5979        | KX641818              | Dahanukar <i>et al.</i> 2016 |
|                        | Ranipuram                           | WILD-15-AMP-615  | KX641819              | Dahanukar <i>et al.</i> 2016 |
|                        | Wattakole                           | WILD-16-AMP-650  | KX641820              | Dahanukar <i>et al.</i> 2016 |
| <i>Indirana yadera</i> | Kozhikana, Periyar TR, Kerala       | SDBDU 2015.2984  | KX966140              | This study                   |
|                        | Methooty, Kerala                    | SDBDU 2012.2744  | KX966141,<br>KX966175 | This study                   |
|                        | Neriamangalam, Kerala               | SDBDU 2011.1120  | KX966142              | This study                   |
|                        | Neriamangalam, Kerala               | SDBDU 2011.1124  | KX966143              | This study                   |
|                        | Nilakkal, Kerala                    | SDBDU 2006.4852  | KX966144              | This study                   |
|                        | Vazhachal, Kerala                   | SDBDU 2015.3155  | KX966145              | This study                   |
|                        | –                                   | AA244            | JQ596674              | Nair <i>et al.</i> 2012      |
|                        | –                                   | AA246            | JQ596675              | Nair <i>et al.</i> 2012      |
|                        | –                                   | AA724            | JQ596676              | Nair <i>et al.</i> 2012      |

|                                    |                                          |                  |                    |                                      |
|------------------------------------|------------------------------------------|------------------|--------------------|--------------------------------------|
|                                    | Neyyar                                   | WILD-13-AMP-338  | KX641821           | Dahanukar <i>et al.</i> 2016         |
|                                    | Vagamalai                                | BNHS 5982        | KX641822           | Dahanukar <i>et al.</i> 2016         |
|                                    | Chimmony                                 | WILD-14-AMP-479  | KX641823           | Dahanukar <i>et al.</i> 2016         |
| <i>Sallywalkerana diplosticta</i>  | Athirimala, Kerala                       | SDBDU 2002.512   | KX966146           | This study                           |
|                                    | Athirimala, Kerala                       | SDBDU 2003.40103 | KX966147           | This study                           |
|                                    | Pandimotta, Shendurney WLS, Kerala       | SDBDU 2011.283   | KX966148           | This study                           |
|                                    | Pandimotta, Shendurney WLS, Kerala       | SDBDU 2011.284   | KX966149           | This study                           |
|                                    | Pandipath, Agasthyamala Hills, Kerala    | SDBDU 2015.2956  | KX966150, KX966176 | This study                           |
|                                    | –                                        | AA791            | JQ596678           | Nair <i>et al.</i> 2012              |
|                                    | –                                        | AA793            | JQ596679           | Nair <i>et al.</i> 2012              |
|                                    | –                                        | AA809            | JQ596680           | Nair <i>et al.</i> 2012              |
|                                    | Bonnacaud                                | WILD-15-AMP-640  | KX641828           | Dahanukar <i>et al.</i> 2016         |
| <i>Sallywalkerana leptodactyla</i> | Anamudi, Eravikulam NP, Kerala           | SDBDU 2002.1026  | KX966151           | This study                           |
|                                    | Eravikulam NP, Kerala                    | SDBDU 2011.1056A | KX966152, KX966177 | This study                           |
|                                    | Mattupetti, Kerala                       | SDBDU 2013.911   | KX966153           | This study                           |
|                                    | Munnar, Kerala                           | SDBDU 2005.31    | KX966154           | This study                           |
|                                    | Ponkalapara, Kerala                      | SDBDU 2007.4330  | KX966155           | This study                           |
|                                    | Vagvarai, Eravikulam NP, Kerala          | SDBDU 2009.1971  | KX966156           | This study                           |
|                                    | Andiparai shola, Valparai, Tamil Nadu    | SDBDU 2002.1176  | KX966157           | This study                           |
|                                    | Grass Hills, Tamil Nadu                  | SDBDU 2005.19    | KX966158           | This study                           |
|                                    | Kodaikanal, Tamil Nadu                   | SDBDU 2002.916   | KX966159           | This study                           |
|                                    | Kodaikanal, Tamil Nadu                   | SDBDU 2002.917   | KX966160           | This study                           |
|                                    | Valparai, Tamil Nadu                     | SDBDU 2004.40336 | KX966161           | This study                           |
|                                    | India                                    | FB-2000a         | AF249051           | Bossuyt & Milinkovitch 2000          |
|                                    | India                                    | VUB 0037         | JN644772           | Van Bocxlaer <i>et al.</i> 2011      |
|                                    | Eravikulam                               | WILD-13-AMP-192  | KX641825           | Dahanukar <i>et al.</i> 2016         |
|                                    | Eravikulam                               | WILD-13-AMP-186  | KX641826           | Dahanukar <i>et al.</i> 2016         |
|                                    | Eravikulam                               | WILD-13-AMP-184  | KX641827           | Dahanukar <i>et al.</i> 2016         |
| <i>Sallywalkerana phrynoderma</i>  | Grass Hills, Akkamalai shola, Tamil Nadu | SDBDU 2002.1181  | KX966162, KX966178 | This study                           |
|                                    | Anamalai                                 | WILD-14-AMP-509  | KX641824           | Dahanukar <i>et al.</i> 2016         |
| <b>Outgroup</b>                    |                                          |                  |                    |                                      |
| <i>Nyctibatrachus</i> sp.          | Nelliampathy, Kerala                     | SDBDU 2011.1138  | KJ711394, KX966179 | Biju <i>et al.</i> 2014a, This study |
