# Supplementary material for: Molecular and Morphological Study of Leaping Frogs (Anura, Ranixalidae) with Description of Two New Species
Source: PubMed Central journal article supplement (PMC5112961; doi:10.1371/journal.pone.0166326), 2016-11-16
Supplement: pone.0166326.s013.pdf [file pone.0166326.s013.pdf]

**Molecular and morphological study of Leaping frogs (Anura, Ranixalidae) with description of two new species**

Sonali Garg, SD Biju

**S3 Table. Uncorrected intraspecific pairwise distances between 16S mitochondrial gene sequences.** The table gives mean and standard deviation values over all pairwise comparisons among individuals or populations of a species. N is the number of individuals for each species. The original p-distances are shown in percentage.

| Species                            | N  | Mean | SD  | Min | Max |
|------------------------------------|----|------|-----|-----|-----|
| <i>Indirana beddomii</i>           | 22 | 1.2  | 0.9 | 0.0 | 3.5 |
| <i>Indirana bhadrai</i>            | 1  | –    | –   | –   | –   |
| <i>Indirana brachytarsus</i>       | 64 | 0.4  | 0.3 | 0.0 | 1.5 |
| <i>Indirana chiravasi</i>          | 17 | 0.1  | 0.1 | 0.0 | 0.4 |
| <i>Indirana duboisi</i>            | 19 | 0.5  | 0.3 | 0.0 | 1.3 |
| <i>Indirana gundia</i>             | 21 | 0.2  | 0.2 | 0.0 | 0.7 |
| <i>Indirana leithii</i>            | 20 | 0.7  | 0.7 | 0.0 | 1.7 |
| <i>Indirana paramakri</i>          | 8  | 0.6  | 0.4 | 0.0 | 1.3 |
| <i>Indirana salelkari</i>          | 6  | 1.2  | 0.9 | 0.0 | 2.2 |
| <i>Indirana sarojamma</i>          | 5  | 0.2  | 0.2 | 0.0 | 0.4 |
| <i>Indirana semipalmata</i>        | 38 | 1.1  | 0.7 | 0.0 | 2.4 |
| <i>Indirana tysoni</i>             | 9  | 0.0  | 0.0 | 0.0 | 0.0 |
| <i>Indirana yadera</i>             | 12 | 0.4  | 0.3 | 0.0 | 1.1 |
| <i>Sallywalkerana diplosticta</i>  | 9  | 1.1  | 0.6 | 0.0 | 1.7 |
| <i>Sallywalkerana leptodactyla</i> | 16 | 0.3  | 0.3 | 0.0 | 1.4 |
| <i>Sallywalkerana phrynoderma</i>  | 2  | 0.0  | –   | 0.0 | 0.0 |
