# Supplementary material for: Molecular and Morphological Study of Leaping Frogs (Anura, Ranixalidae) with Description of Two New Species
Source: PubMed Central journal article supplement (PMC5112961; doi:10.1371/journal.pone.0166326), 2016-11-16
Supplement: pone.0166326.s014.pdf [file pone.0166326.s014.pdf]

**Molecular and morphological study of Leaping frogs (Anura, Ranixalidae) with description of two new species**

Sonali Garg, SD Biju

**S4 Table. Uncorrected interspecific pairwise distances between 16S mitochondrial gene sequences.** The table gives mean and standard deviation values over all pairwise comparisons of individuals sequenced from the two species being compared. N is the number of pairwise comparisons. N1 and N2 represent number of individuals for Taxon 1 and Taxon 2, respectively. The original p-distances are shown in percentage.

| Taxon 1                            | Taxon 2                            | N1 | N2 | N    | Mean $\pm$ SD  | Min  | Max  |
|------------------------------------|------------------------------------|----|----|------|----------------|------|------|
| <b>Indirana beddomii GROUP</b>     |                                    |    |    |      |                |      |      |
| <i>Indirana beddomii</i>           | <i>Indirana bhadrai</i>            | 22 | 1  | 22   | 4.2 $\pm$ 0.3  | 3.7  | 5.0  |
| <i>Indirana beddomii</i>           | <i>Indirana brachytarsus</i>       | 22 | 64 | 1408 | 6.3 $\pm$ 0.4  | 5.5  | 7.7  |
| <i>Indirana beddomii</i>           | <i>Indirana leithii</i>            | 22 | 20 | 440  | 4.9 $\pm$ 0.7  | 3.4  | 6.8  |
| <i>Indirana beddomii</i>           | <i>Indirana sarojamma</i>          | 22 | 5  | 110  | 5.5 $\pm$ 0.4  | 5.0  | 7.0  |
| <i>Indirana beddomii</i>           | <i>Indirana tysoni</i>             | 22 | 9  | 198  | 4.7 $\pm$ 0.5  | 4.0  | 5.9  |
| <i>Indirana beddomii</i>           | <i>Indirana yadera</i>             | 22 | 12 | 264  | 6.2 $\pm$ 0.5  | 5.5  | 8.5  |
| <i>Indirana bhadrai</i>            | <i>Indirana brachytarsus</i>       | 1  | 64 | 64   | 5.8 $\pm$ 0.2  | 5.5  | 6.6  |
| <i>Indirana bhadrai</i>            | <i>Indirana leithii</i>            | 1  | 20 | 20   | 4.7 $\pm$ 0.7  | 3.9  | 5.8  |
| <i>Indirana bhadrai</i>            | <i>Indirana sarojamma</i>          | 1  | 5  | 5    | 5.1 $\pm$ 0.4  | 4.9  | 5.7  |
| <i>Indirana bhadrai</i>            | <i>Indirana tysoni</i>             | 1  | 9  | 9    | 3.1 $\pm$ 0.1  | 3.0  | 3.1  |
| <i>Indirana bhadrai</i>            | <i>Indirana yadera</i>             | 1  | 12 | 12   | 5.6 $\pm$ 0.2  | 5.3  | 6.1  |
| <i>Indirana brachytarsus</i>       | <i>Indirana leithii</i>            | 64 | 20 | 1280 | 6.7 $\pm$ 0.6  | 5.6  | 7.9  |
| <i>Indirana brachytarsus</i>       | <i>Indirana sarojamma</i>          | 64 | 5  | 320  | 8.0 $\pm$ 0.4  | 7.5  | 9.0  |
| <i>Indirana brachytarsus</i>       | <i>Indirana tysoni</i>             | 64 | 9  | 576  | 6.9 $\pm$ 0.2  | 6.4  | 7.7  |
| <i>Indirana brachytarsus</i>       | <i>Indirana yadera</i>             | 64 | 12 | 768  | 8.7 $\pm$ 0.3  | 8.1  | 9.6  |
| <i>Indirana leithii</i>            | <i>Indirana sarojamma</i>          | 20 | 5  | 100  | 6.2 $\pm$ 0.6  | 5.5  | 7.3  |
| <i>Indirana leithii</i>            | <i>Indirana tysoni</i>             | 20 | 9  | 180  | 6.1 $\pm$ 0.7  | 5.2  | 7.1  |
| <i>Indirana leithii</i>            | <i>Indirana yadera</i>             | 20 | 12 | 240  | 7.0 $\pm$ 0.7  | 6.1  | 8.2  |
| <i>Indirana sarojamma</i>          | <i>Indirana tysoni</i>             | 5  | 9  | 45   | 5.8 $\pm$ 0.2  | 5.6  | 6.1  |
| <i>Indirana sarojamma</i>          | <i>Indirana yadera</i>             | 5  | 12 | 60   | 3.5 $\pm$ 0.1  | 3.3  | 3.7  |
| <i>Indirana tysoni</i>             | <i>Indirana yadera</i>             | 9  | 12 | 108  | 5.9 $\pm$ 0.1  | 5.6  | 6.1  |
| <b>Indirana semipalmata GROUP</b>  |                                    |    |    |      |                |      |      |
| <i>Indirana chiravasi</i>          | <i>Indirana duboisi</i>            | 17 | 19 | 323  | 3.0 $\pm$ 0.2  | 2.7  | 3.7  |
| <i>Indirana chiravasi</i>          | <i>Indirana gundia</i>             | 17 | 21 | 357  | 3.9 $\pm$ 0.3  | 3.5  | 4.6  |
| <i>Indirana chiravasi</i>          | <i>Indirana paramakri</i>          | 17 | 8  | 136  | 6.7 $\pm$ 0.5  | 6.1  | 7.8  |
| <i>Indirana chiravasi</i>          | <i>Indirana salelkari</i>          | 17 | 6  | 102  | 3.2 $\pm$ 0.4  | 2.5  | 3.7  |
| <i>Indirana chiravasi</i>          | <i>Indirana semipalmata</i>        | 17 | 38 | 646  | 5.1 $\pm$ 0.4  | 4.3  | 6.4  |
| <i>Indirana duboisi</i>            | <i>Indirana gundia</i>             | 19 | 21 | 399  | 3.2 $\pm$ 0.3  | 2.4  | 3.9  |
| <i>Indirana duboisi</i>            | <i>Indirana paramakri</i>          | 19 | 8  | 152  | 5.4 $\pm$ 0.6  | 4.5  | 7.0  |
| <i>Indirana duboisi</i>            | <i>Indirana salelkari</i>          | 19 | 6  | 114  | 2.6 $\pm$ 0.3  | 2.1  | 3.3  |
| <i>Indirana duboisi</i>            | <i>Indirana semipalmata</i>        | 19 | 38 | 722  | 4.7 $\pm$ 0.3  | 4.2  | 5.6  |
| <i>Indirana gundia</i>             | <i>Indirana paramakri</i>          | 21 | 8  | 168  | 5.2 $\pm$ 0.5  | 4.2  | 6.3  |
| <i>Indirana gundia</i>             | <i>Indirana salelkari</i>          | 21 | 6  | 126  | 4.0 $\pm$ 0.3  | 3.5  | 4.4  |
| <i>Indirana gundia</i>             | <i>Indirana semipalmata</i>        | 21 | 38 | 798  | 3.3 $\pm$ 0.2  | 2.6  | 3.9  |
| <i>Indirana paramakri</i>          | <i>Indirana salelkari</i>          | 8  | 6  | 48   | 6.1 $\pm$ 0.5  | 5.5  | 7.0  |
| <i>Indirana paramakri</i>          | <i>Indirana semipalmata</i>        | 8  | 38 | 304  | 4.5 $\pm$ 0.5  | 3.7  | 5.9  |
| <i>Indirana salelkari</i>          | <i>Indirana semipalmata</i>        | 6  | 38 | 228  | 5.4 $\pm$ 0.5  | 4.3  | 6.3  |
| <b>Sallywalkerana</b>              |                                    |    |    |      |                |      |      |
| <i>Sallywalkerana diplosticta</i>  | <i>Sallywalkerana leptodactyla</i> | 9  | 16 | 144  | 11.2 $\pm$ 0.4 | 10.0 | 12.7 |
| <i>Sallywalkerana diplosticta</i>  | <i>Sallywalkerana phrynoderma</i>  | 9  | 2  | 18   | 12.2 $\pm$ 0.5 | 11.5 | 12.7 |
| <i>Sallywalkerana leptodactyla</i> | <i>Sallywalkerana phrynoderma</i>  | 16 | 2  | 32   | 6.6 $\pm$ 0.3  | 5.9  | 7.6  |
